# Supplementary material for: Graph Fourier transform for spatial omics representation and analyses of complex organs
Source: Research Square preprint supplement (doi:10.21203/rs.3.rs-3952048/v1), 2024-02-15
Supplement: Supplementary file 11 [file a94260118356cf25785a86e2.xlsx]

## Sheet: Sheet1
Method	Usage	Sample_info	Parameter	ARI
scVI	independent test in benchmarking	18-64	scVI_hidden-256-genelikelihood-poisson	0.192728
scVI	independent test in benchmarking	S2-8	scVI_hidden-256-genelikelihood-poisson	0.332513
scVI	independent test in benchmarking	S2-5	scVI_hidden-256-genelikelihood-poisson	0.510192
scVI	independent test in benchmarking	151671	scVI_hidden-256-genelikelihood-poisson	0.293109
scVI	independent test in benchmarking	151508	scVI_hidden-256-genelikelihood-poisson	0.264962
scVI	independent test in benchmarking	151675	scVI_hidden-256-genelikelihood-poisson	0.270078
scVI	independent test in benchmarking	151674	scVI_hidden-256-genelikelihood-poisson	0.269081
scVI	independent test in benchmarking	T4857	scVI_hidden-256-genelikelihood-poisson	0.333416
scVI	independent test in benchmarking	151669	scVI_hidden-256-genelikelihood-poisson	0.222999
scVI	independent test in benchmarking	151509	scVI_hidden-256-genelikelihood-poisson	0.270213
scVI	independent test in benchmarking	151507	scVI_hidden-256-genelikelihood-poisson	0.258003
scVI	independent test in benchmarking	151676	scVI_hidden-256-genelikelihood-poisson	0.289693
scVI	independent test in benchmarking	151670	scVI_hidden-256-genelikelihood-poisson	0.177711
MAGIC	independent test in benchmarking	18-64	MAGIC_knn-3-t-4	0.182984
MAGIC	independent test in benchmarking	S2-8	MAGIC_knn-3-t-4	0.246273
MAGIC	independent test in benchmarking	S2-5	MAGIC_knn-3-t-4	0.540344
MAGIC	independent test in benchmarking	151671	MAGIC_knn-3-t-4	0.339193
MAGIC	independent test in benchmarking	151508	MAGIC_knn-3-t-4	0.262758
MAGIC	independent test in benchmarking	151675	MAGIC_knn-3-t-4	0.143748
MAGIC	independent test in benchmarking	151674	MAGIC_knn-3-t-4	0.215921
MAGIC	independent test in benchmarking	T4857	MAGIC_knn-3-t-4	0.231015
MAGIC	independent test in benchmarking	151669	MAGIC_knn-3-t-4	0.328364
MAGIC	independent test in benchmarking	151509	MAGIC_knn-3-t-4	0.238266
MAGIC	independent test in benchmarking	151507	MAGIC_knn-3-t-4	0.287538
MAGIC	independent test in benchmarking	151676	MAGIC_knn-3-t-4	0.156273
MAGIC	independent test in benchmarking	151670	MAGIC_knn-3-t-4	0.160364
SpaGFT	independent test in benchmarking	18-64	SpaGFT_c-0.005-low-15	0.335085
SpaGFT	independent test in benchmarking	S2-8	SpaGFT_c-0.005-low-15	0.310875
SpaGFT	independent test in benchmarking	S2-5	SpaGFT_c-0.005-low-15	0.52406
SpaGFT	independent test in benchmarking	151671	SpaGFT_c-0.005-low-15	0.472265
SpaGFT	independent test in benchmarking	151508	SpaGFT_c-0.005-low-15	0.362372
SpaGFT	independent test in benchmarking	151675	SpaGFT_c-0.005-low-15	0.413467
SpaGFT	independent test in benchmarking	151674	SpaGFT_c-0.005-low-15	0.340221
SpaGFT	independent test in benchmarking	T4857	SpaGFT_c-0.005-low-15	0.449858
SpaGFT	independent test in benchmarking	151669	SpaGFT_c-0.005-low-15	0.237447
SpaGFT	independent test in benchmarking	151509	SpaGFT_c-0.005-low-15	0.426351
SpaGFT	independent test in benchmarking	151507	SpaGFT_c-0.005-low-15	0.414069
SpaGFT	independent test in benchmarking	151676	SpaGFT_c-0.005-low-15	0.382739
SpaGFT	independent test in benchmarking	151670	SpaGFT_c-0.005-low-15	0.238294
DCA	independent test in benchmarking	18-64	DCA_hidden-size-1-48-hidden-size-2-24	0.0893873
DCA	independent test in benchmarking	S2-8	DCA_hidden-size-1-48-hidden-size-2-24	0.299398
DCA	independent test in benchmarking	S2-5	DCA_hidden-size-1-48-hidden-size-2-24	0.554265
DCA	independent test in benchmarking	151671	DCA_hidden-size-1-48-hidden-size-2-24	0.13749
DCA	independent test in benchmarking	151508	DCA_hidden-size-1-48-hidden-size-2-24	0.102419
DCA	independent test in benchmarking	151675	DCA_hidden-size-1-48-hidden-size-2-24	0.159609
DCA	independent test in benchmarking	151674	DCA_hidden-size-1-48-hidden-size-2-24	0.163145
DCA	independent test in benchmarking	T4857	DCA_hidden-size-1-48-hidden-size-2-24	0.197246
DCA	independent test in benchmarking	151669	DCA_hidden-size-1-48-hidden-size-2-24	0.110937
DCA	independent test in benchmarking	151509	DCA_hidden-size-1-48-hidden-size-2-24	0.142731
DCA	independent test in benchmarking	151507	DCA_hidden-size-1-48-hidden-size-2-24	0.092668
DCA	independent test in benchmarking	151676	DCA_hidden-size-1-48-hidden-size-2-24	0.170438
DCA	independent test in benchmarking	151670	DCA_hidden-size-1-48-hidden-size-2-24	0.0968682
SAVER-X	independent test in benchmarking	18-64	SAVER-X_batch-32-fold-4	0.183876
SAVER-X	independent test in benchmarking	S2-8	SAVER-X_batch-32-fold-4	0.319786
SAVER-X	independent test in benchmarking	S2-5	SAVER-X_batch-32-fold-4	0.507289
SAVER-X	independent test in benchmarking	151671	SAVER-X_batch-32-fold-4	0.287907
SAVER-X	independent test in benchmarking	151508	SAVER-X_batch-32-fold-4	0.268097
SAVER-X	independent test in benchmarking	151675	SAVER-X_batch-32-fold-4	0.277714
SAVER-X	independent test in benchmarking	151674	SAVER-X_batch-32-fold-4	0.275228
SAVER-X	independent test in benchmarking	T4857	SAVER-X_batch-32-fold-4	0.329898
SAVER-X	independent test in benchmarking	151669	SAVER-X_batch-32-fold-4	0.229564
SAVER-X	independent test in benchmarking	151509	SAVER-X_batch-32-fold-4	0.333103
SAVER-X	independent test in benchmarking	151507	SAVER-X_batch-32-fold-4	0.263644
SAVER-X	independent test in benchmarking	151676	SAVER-X_batch-32-fold-4	0.288852
SAVER-X	independent test in benchmarking	151670	SAVER-X_batch-32-fold-4	0.194501
Sprod	independent test in benchmarking	18-64	Sprod_dim-12-r-0.10	0.27408
Sprod	independent test in benchmarking	S2-8	Sprod_dim-12-r-0.10	0.374643
Sprod	independent test in benchmarking	S2-5	Sprod_dim-12-r-0.10	0.468169
Sprod	independent test in benchmarking	151671	Sprod_dim-12-r-0.10	0.419349
Sprod	independent test in benchmarking	151508	Sprod_dim-12-r-0.10	0.373097
Sprod	independent test in benchmarking	151675	Sprod_dim-12-r-0.10	0.368109
Sprod	independent test in benchmarking	151674	Sprod_dim-12-r-0.10	0.342657
Sprod	independent test in benchmarking	T4857	Sprod_dim-12-r-0.10	0.416418
Sprod	independent test in benchmarking	151669	Sprod_dim-12-r-0.10	0.1823
Sprod	independent test in benchmarking	151509	Sprod_dim-12-r-0.10	0.329757
Sprod	independent test in benchmarking	151507	Sprod_dim-12-r-0.10	0.380166
Sprod	independent test in benchmarking	151676	Sprod_dim-12-r-0.10	0.324843
Sprod	independent test in benchmarking	151670	Sprod_dim-12-r-0.10	0.240386
netNMF-sc	independent test in benchmarking	18-64	netNMF-sc_dim-12-alpha-120	0.264628
netNMF-sc	independent test in benchmarking	S2-8	netNMF-sc_dim-12-alpha-120	0.240278
netNMF-sc	independent test in benchmarking	S2-5	netNMF-sc_dim-12-alpha-120	0.295228
netNMF-sc	independent test in benchmarking	151671	netNMF-sc_dim-12-alpha-120	0.22262
netNMF-sc	independent test in benchmarking	151508	netNMF-sc_dim-12-alpha-120	0.300307
netNMF-sc	independent test in benchmarking	151675	netNMF-sc_dim-12-alpha-120	0.253484
netNMF-sc	independent test in benchmarking	151674	netNMF-sc_dim-12-alpha-120	0.212443
netNMF-sc	independent test in benchmarking	T4857	netNMF-sc_dim-12-alpha-120	0.212792
netNMF-sc	independent test in benchmarking	151669	netNMF-sc_dim-12-alpha-120	0.185682
netNMF-sc	independent test in benchmarking	151509	netNMF-sc_dim-12-alpha-120	0.307801
netNMF-sc	independent test in benchmarking	151507	netNMF-sc_dim-12-alpha-120	0.29745
netNMF-sc	independent test in benchmarking	151676	netNMF-sc_dim-12-alpha-120	0.236251
netNMF-sc	independent test in benchmarking	151670	netNMF-sc_dim-12-alpha-120	0.162758
scVI	grid search for paramether optimization	151672	scVI_hidden-64-genelikelihood-poisson	0.254938
scVI	grid search for paramether optimization	151672	scVI_hidden-64-genelikelihood-nb	0.249407
scVI	grid search for paramether optimization	151672	scVI_hidden-256-genelikelihood-poisson	0.366735
scVI	grid search for paramether optimization	151672	scVI_hidden-256-genelikelihood-nb	0.356214
scVI	grid search for paramether optimization	151672	scVI_hidden-128-genelikelihood-nb	0.347229
scVI	grid search for paramether optimization	151672	scVI_hidden-128-genelikelihood-zinb	0.258712
scVI	grid search for paramether optimization	151672	scVI_hidden-64-genelikelihood-zinb	0.244339
scVI	grid search for paramether optimization	151672	scVI_hidden-256-genelikelihood-zinb	0.25298
scVI	grid search for paramether optimization	151672	scVI_hidden-128-genelikelihood-poisson	0.255326
scVI	grid search for paramether optimization	151510	scVI_hidden-256-genelikelihood-poisson	0.264293
scVI	grid search for paramether optimization	151510	scVI_hidden-128-genelikelihood-nb	0.253887
scVI	grid search for paramether optimization	151510	scVI_hidden-64-genelikelihood-nb	0.255456
scVI	grid search for paramether optimization	151510	scVI_hidden-64-genelikelihood-zinb	0.257689
scVI	grid search for paramether optimization	151510	scVI_hidden-128-genelikelihood-poisson	0.255565
scVI	grid search for paramether optimization	151510	scVI_hidden-256-genelikelihood-nb	0.253643
scVI	grid search for paramether optimization	151510	scVI_hidden-64-genelikelihood-poisson	0.259672
scVI	grid search for paramether optimization	151510	scVI_hidden-256-genelikelihood-zinb	0.265707
scVI	grid search for paramether optimization	151510	scVI_hidden-128-genelikelihood-zinb	0.247518
scVI	grid search for paramether optimization	151673	scVI_hidden-128-genelikelihood-nb	0.256009
scVI	grid search for paramether optimization	151673	scVI_hidden-128-genelikelihood-poisson	0.271591
scVI	grid search for paramether optimization	151673	scVI_hidden-64-genelikelihood-poisson	0.268212
scVI	grid search for paramether optimization	151673	scVI_hidden-64-genelikelihood-nb	0.272194
scVI	grid search for paramether optimization	151673	scVI_hidden-256-genelikelihood-poisson	0.29108
scVI	grid search for paramether optimization	151673	scVI_hidden-64-genelikelihood-zinb	0.285058
scVI	grid search for paramether optimization	151673	scVI_hidden-256-genelikelihood-zinb	0.296881
scVI	grid search for paramether optimization	151673	scVI_hidden-128-genelikelihood-zinb	0.297128
scVI	grid search for paramether optimization	151673	scVI_hidden-256-genelikelihood-nb	0.2871
MAGIC	grid search for paramether optimization	151672	MAGIC_knn-3-t-3	0.241862
MAGIC	grid search for paramether optimization	151672	MAGIC_knn-5-t-3	0.219096
MAGIC	grid search for paramether optimization	151672	MAGIC_knn-6-t-2	0.248441
MAGIC	grid search for paramether optimization	151672	MAGIC_knn-6-t-3	0.196467
MAGIC	grid search for paramether optimization	151672	MAGIC_knn-6-t-4	0.185124
MAGIC	grid search for paramether optimization	151672	MAGIC_knn-5-t-2	0.25337
MAGIC	grid search for paramether optimization	151672	MAGIC_knn-3-t-4	0.21584
MAGIC	grid search for paramether optimization	151672	MAGIC_knn-3-t-2	0.270621
MAGIC	grid search for paramether optimization	151672	MAGIC_knn-5-t-4	0.212398
MAGIC	grid search for paramether optimization	151510	MAGIC_knn-5-t-2	0.19376
MAGIC	grid search for paramether optimization	151510	MAGIC_knn-6-t-4	0.183296
MAGIC	grid search for paramether optimization	151510	MAGIC_knn-6-t-2	0.189418
MAGIC	grid search for paramether optimization	151510	MAGIC_knn-5-t-4	0.192917
MAGIC	grid search for paramether optimization	151510	MAGIC_knn-3-t-2	0.193377
MAGIC	grid search for paramether optimization	151510	MAGIC_knn-3-t-3	0.190722
MAGIC	grid search for paramether optimization	151510	MAGIC_knn-3-t-4	0.207152
MAGIC	grid search for paramether optimization	151510	MAGIC_knn-6-t-3	0.201372
MAGIC	grid search for paramether optimization	151510	MAGIC_knn-5-t-3	0.205157
MAGIC	grid search for paramether optimization	151673	MAGIC_knn-6-t-4	0.174494
MAGIC	grid search for paramether optimization	151673	MAGIC_knn-6-t-2	0.182628
MAGIC	grid search for paramether optimization	151673	MAGIC_knn-6-t-3	0.176798
MAGIC	grid search for paramether optimization	151673	MAGIC_knn-5-t-3	0.181258
MAGIC	grid search for paramether optimization	151673	MAGIC_knn-5-t-2	0.185786
MAGIC	grid search for paramether optimization	151673	MAGIC_knn-3-t-4	0.181793
MAGIC	grid search for paramether optimization	151673	MAGIC_knn-3-t-3	0.187201
MAGIC	grid search for paramether optimization	151673	MAGIC_knn-5-t-4	0.1786
MAGIC	grid search for paramether optimization	151673	MAGIC_knn-3-t-2	0.180816
SpaGFT	grid search for paramether optimization	151672	SpaGFT_c-0.007-low-17	0.530255
SpaGFT	grid search for paramether optimization	151672	SpaGFT_c-0.005-low-17	0.531791
SpaGFT	grid search for paramether optimization	151672	SpaGFT_c-0.003-low-15	0.507729
SpaGFT	grid search for paramether optimization	151672	SpaGFT_c-0.007-low-13	0.529636
SpaGFT	grid search for paramether optimization	151672	SpaGFT_c-0.003-low-17	0.512646
SpaGFT	grid search for paramether optimization	151672	SpaGFT_c-0.005-low-15	0.525231
SpaGFT	grid search for paramether optimization	151672	SpaGFT_c-0.007-low-15	0.53013
SpaGFT	grid search for paramether optimization	151672	SpaGFT_c-0.003-low-13	0.501905
SpaGFT	grid search for paramether optimization	151672	SpaGFT_c-0.005-low-13	0.517564
SpaGFT	grid search for paramether optimization	151510	SpaGFT_c-0.003-low-17	0.439887
SpaGFT	grid search for paramether optimization	151510	SpaGFT_c-0.003-low-13	0.421965
SpaGFT	grid search for paramether optimization	151510	SpaGFT_c-0.005-low-13	0.438386
SpaGFT	grid search for paramether optimization	151510	SpaGFT_c-0.007-low-17	0.444733
SpaGFT	grid search for paramether optimization	151510	SpaGFT_c-0.005-low-17	0.356213
SpaGFT	grid search for paramether optimization	151510	SpaGFT_c-0.005-low-15	0.447933
SpaGFT	grid search for paramether optimization	151510	SpaGFT_c-0.007-low-13	0.444068
SpaGFT	grid search for paramether optimization	151510	SpaGFT_c-0.003-low-15	0.429509
SpaGFT	grid search for paramether optimization	151510	SpaGFT_c-0.007-low-15	0.443929
SpaGFT	grid search for paramether optimization	151673	SpaGFT_c-0.003-low-17	0.399517
SpaGFT	grid search for paramether optimization	151673	SpaGFT_c-0.007-low-13	0.326592
SpaGFT	grid search for paramether optimization	151673	SpaGFT_c-0.003-low-15	0.409648
SpaGFT	grid search for paramether optimization	151673	SpaGFT_c-0.005-low-13	0.326263
SpaGFT	grid search for paramether optimization	151673	SpaGFT_c-0.007-low-15	0.325834
SpaGFT	grid search for paramether optimization	151673	SpaGFT_c-0.003-low-13	0.37772
SpaGFT	grid search for paramether optimization	151673	SpaGFT_c-0.005-low-17	0.400508
SpaGFT	grid search for paramether optimization	151673	SpaGFT_c-0.007-low-17	0.318032
SpaGFT	grid search for paramether optimization	151673	SpaGFT_c-0.005-low-15	0.402682
DCA	grid search for paramether optimization	151672	DCA_hidden-size-1-64-hidden-size-2-32	0.123309
DCA	grid search for paramether optimization	151672	DCA_hidden-size-1-48-hidden-size-2-24	0.12742
DCA	grid search for paramether optimization	151672	DCA_hidden-size-1-48-hidden-size-2-40	0.122333
DCA	grid search for paramether optimization	151672	DCA_hidden-size-1-80-hidden-size-2-40	0.120902
DCA	grid search for paramether optimization	151672	DCA_hidden-size-1-64-hidden-size-2-24	0.122878
DCA	grid search for paramether optimization	151672	DCA_hidden-size-1-64-hidden-size-2-40	0.116905
DCA	grid search for paramether optimization	151672	DCA_hidden-size-1-48-hidden-size-2-32	0.125214
DCA	grid search for paramether optimization	151672	DCA_hidden-size-1-80-hidden-size-2-24	0.119876
DCA	grid search for paramether optimization	151672	DCA_hidden-size-1-80-hidden-size-2-32	0.120166
DCA	grid search for paramether optimization	151510	DCA_hidden-size-1-80-hidden-size-2-32	0.116563
DCA	grid search for paramether optimization	151510	DCA_hidden-size-1-48-hidden-size-2-24	0.120782
DCA	grid search for paramether optimization	151510	DCA_hidden-size-1-64-hidden-size-2-24	0.119793
DCA	grid search for paramether optimization	151510	DCA_hidden-size-1-48-hidden-size-2-32	0.118772
DCA	grid search for paramether optimization	151510	DCA_hidden-size-1-48-hidden-size-2-40	0.112252
DCA	grid search for paramether optimization	151510	DCA_hidden-size-1-64-hidden-size-2-40	0.118489
DCA	grid search for paramether optimization	151510	DCA_hidden-size-1-64-hidden-size-2-32	0.113684
DCA	grid search for paramether optimization	151510	DCA_hidden-size-1-80-hidden-size-2-24	0.110763
DCA	grid search for paramether optimization	151510	DCA_hidden-size-1-80-hidden-size-2-40	0.111434
DCA	grid search for paramether optimization	151673	DCA_hidden-size-1-80-hidden-size-2-32	0.145692
DCA	grid search for paramether optimization	151673	DCA_hidden-size-1-64-hidden-size-2-32	0.147096
DCA	grid search for paramether optimization	151673	DCA_hidden-size-1-64-hidden-size-2-24	0.146628
DCA	grid search for paramether optimization	151673	DCA_hidden-size-1-48-hidden-size-2-32	0.149402
DCA	grid search for paramether optimization	151673	DCA_hidden-size-1-80-hidden-size-2-24	0.149928
DCA	grid search for paramether optimization	151673	DCA_hidden-size-1-48-hidden-size-2-40	0.147312
DCA	grid search for paramether optimization	151673	DCA_hidden-size-1-64-hidden-size-2-40	0.149438
DCA	grid search for paramether optimization	151673	DCA_hidden-size-1-80-hidden-size-2-40	0.149096
DCA	grid search for paramether optimization	151673	DCA_hidden-size-1-48-hidden-size-2-24	0.150339
SAVER-X	grid search for paramether optimization	151672	SAVER-X_batch-32-fold-8	0.25734
SAVER-X	grid search for paramether optimization	151672	SAVER-X_batch-64-fold-6	0.245636
SAVER-X	grid search for paramether optimization	151672	SAVER-X_batch-128-fold-6	0.26413
SAVER-X	grid search for paramether optimization	151672	SAVER-X_batch-64-fold-8	0.246136
SAVER-X	grid search for paramether optimization	151672	SAVER-X_batch-128-fold-4	0.262954
SAVER-X	grid search for paramether optimization	151672	SAVER-X_batch-32-fold-6	0.257769
SAVER-X	grid search for paramether optimization	151672	SAVER-X_batch-128-fold-8	0.261883
SAVER-X	grid search for paramether optimization	151672	SAVER-X_batch-64-fold-4	0.250247
SAVER-X	grid search for paramether optimization	151672	SAVER-X_batch-32-fold-4	0.257176
SAVER-X	grid search for paramether optimization	151510	SAVER-X_batch-64-fold-8	0.260665
SAVER-X	grid search for paramether optimization	151510	SAVER-X_batch-128-fold-6	0.259259
SAVER-X	grid search for paramether optimization	151510	SAVER-X_batch-64-fold-4	0.262863
SAVER-X	grid search for paramether optimization	151510	SAVER-X_batch-32-fold-4	0.266943
SAVER-X	grid search for paramether optimization	151510	SAVER-X_batch-128-fold-4	0.256449
SAVER-X	grid search for paramether optimization	151510	SAVER-X_batch-32-fold-6	0.254891
SAVER-X	grid search for paramether optimization	151510	SAVER-X_batch-64-fold-6	0.261621
SAVER-X	grid search for paramether optimization	151510	SAVER-X_batch-128-fold-8	0.25898
SAVER-X	grid search for paramether optimization	151510	SAVER-X_batch-32-fold-8	0.261688
SAVER-X	grid search for paramether optimization	151673	SAVER-X_batch-32-fold-4	0.280468
SAVER-X	grid search for paramether optimization	151673	SAVER-X_batch-64-fold-8	0.283264
SAVER-X	grid search for paramether optimization	151673	SAVER-X_batch-32-fold-6	0.286043
SAVER-X	grid search for paramether optimization	151673	SAVER-X_batch-128-fold-6	0.282934
SAVER-X	grid search for paramether optimization	151673	SAVER-X_batch-128-fold-8	0.283568
SAVER-X	grid search for paramether optimization	151673	SAVER-X_batch-64-fold-4	0.279097
SAVER-X	grid search for paramether optimization	151673	SAVER-X_batch-64-fold-6	0.28275
SAVER-X	grid search for paramether optimization	151673	SAVER-X_batch-32-fold-8	0.281366
SAVER-X	grid search for paramether optimization	151673	SAVER-X_batch-128-fold-4	0.28222
Sprod	grid search for paramether optimization	151672	Sprod_dim-10-r-0.10	0.423577
Sprod	grid search for paramether optimization	151672	Sprod_dim-12-r-0.08	0.459978
Sprod	grid search for paramether optimization	151672	Sprod_dim-8-r-0.08	0.507828
Sprod	grid search for paramether optimization	151672	Sprod_dim-8-r-0.10	0.470283
Sprod	grid search for paramether optimization	151672	Sprod_dim-8-r-0.06	0.520449
Sprod	grid search for paramether optimization	151672	Sprod_dim-12-r-0.06	0.501467
Sprod	grid search for paramether optimization	151672	Sprod_dim-10-r-0.08	0.510155
Sprod	grid search for paramether optimization	151672	Sprod_dim-12-r-0.10	0.480487
Sprod	grid search for paramether optimization	151672	Sprod_dim-10-r-0.06	0.518702
Sprod	grid search for paramether optimization	151510	Sprod_dim-12-r-0.10	0.364327
Sprod	grid search for paramether optimization	151510	Sprod_dim-10-r-0.06	0.350455
Sprod	grid search for paramether optimization	151510	Sprod_dim-10-r-0.10	0.316842
Sprod	grid search for paramether optimization	151510	Sprod_dim-8-r-0.06	0.343369
Sprod	grid search for paramether optimization	151510	Sprod_dim-10-r-0.08	0.333393
Sprod	grid search for paramether optimization	151510	Sprod_dim-12-r-0.08	0.322304
Sprod	grid search for paramether optimization	151510	Sprod_dim-8-r-0.08	0.324783
Sprod	grid search for paramether optimization	151510	Sprod_dim-12-r-0.06	0.344514
Sprod	grid search for paramether optimization	151510	Sprod_dim-8-r-0.10	0.365493
Sprod	grid search for paramether optimization	151673	Sprod_dim-8-r-0.08	0.346151
Sprod	grid search for paramether optimization	151673	Sprod_dim-10-r-0.06	0.376046
Sprod	grid search for paramether optimization	151673	Sprod_dim-12-r-0.10	0.441817
Sprod	grid search for paramether optimization	151673	Sprod_dim-12-r-0.08	0.33063
Sprod	grid search for paramether optimization	151673	Sprod_dim-10-r-0.10	0.314647
Sprod	grid search for paramether optimization	151673	Sprod_dim-10-r-0.08	0.425186
Sprod	grid search for paramether optimization	151673	Sprod_dim-12-r-0.06	0.427149
Sprod	grid search for paramether optimization	151673	Sprod_dim-8-r-0.10	0.40095
Sprod	grid search for paramether optimization	151673	Sprod_dim-8-r-0.06	0.430605
netNMF-sc	grid search for paramether optimization	151672	netNMF-sc_dim-10-alpha-100	0.218347
netNMF-sc	grid search for paramether optimization	151672	netNMF-sc_dim-12-alpha-100	0.225284
netNMF-sc	grid search for paramether optimization	151672	netNMF-sc_dim-8-alpha-100	0.234191
netNMF-sc	grid search for paramether optimization	151672	netNMF-sc_dim-8-alpha-80	0.231259
netNMF-sc	grid search for paramether optimization	151672	netNMF-sc_dim-8-alpha-120	0.227143
netNMF-sc	grid search for paramether optimization	151672	netNMF-sc_dim-10-alpha-80	0.227053
netNMF-sc	grid search for paramether optimization	151672	netNMF-sc_dim-12-alpha-120	0.208359
netNMF-sc	grid search for paramether optimization	151672	netNMF-sc_dim-12-alpha-80	0.2089
netNMF-sc	grid search for paramether optimization	151672	netNMF-sc_dim-10-alpha-120	0.239345
netNMF-sc	grid search for paramether optimization	151510	netNMF-sc_dim-8-alpha-120	0.226729
netNMF-sc	grid search for paramether optimization	151510	netNMF-sc_dim-10-alpha-120	0.226159
netNMF-sc	grid search for paramether optimization	151510	netNMF-sc_dim-10-alpha-100	0.225466
netNMF-sc	grid search for paramether optimization	151510	netNMF-sc_dim-12-alpha-80	0.225112
netNMF-sc	grid search for paramether optimization	151510	netNMF-sc_dim-8-alpha-80	0.224615
netNMF-sc	grid search for paramether optimization	151510	netNMF-sc_dim-12-alpha-120	0.22833
netNMF-sc	grid search for paramether optimization	151510	netNMF-sc_dim-10-alpha-80	0.223168
netNMF-sc	grid search for paramether optimization	151510	netNMF-sc_dim-8-alpha-100	0.223291
netNMF-sc	grid search for paramether optimization	151510	netNMF-sc_dim-12-alpha-100	0.227674
netNMF-sc	grid search for paramether optimization	151673	netNMF-sc_dim-8-alpha-80	0.226764
netNMF-sc	grid search for paramether optimization	151673	netNMF-sc_dim-8-alpha-100	0.22653
netNMF-sc	grid search for paramether optimization	151673	netNMF-sc_dim-10-alpha-120	0.22655
netNMF-sc	grid search for paramether optimization	151673	netNMF-sc_dim-10-alpha-100	0.227279
netNMF-sc	grid search for paramether optimization	151673	netNMF-sc_dim-10-alpha-80	0.237584
netNMF-sc	grid search for paramether optimization	151673	netNMF-sc_dim-12-alpha-120	0.235392
netNMF-sc	grid search for paramether optimization	151673	netNMF-sc_dim-12-alpha-80	0.232432
netNMF-sc	grid search for paramether optimization	151673	netNMF-sc_dim-12-alpha-100	0.228296
netNMF-sc	grid search for paramether optimization	151673	netNMF-sc_dim-8-alpha-120	0.233368
