# Supplementary material for: Graph Fourier transform for spatial omics representation and analyses of complex organs
Source: Research Square preprint supplement (doi:10.21203/rs.3.rs-3952048/v1), 2024-02-15
Supplement: Supplementary file 14 [file c08f15e41744eb9e7f1cb853.xlsx]

## Sheet: Sheet1
cluster 5	Resolution (Leiden)	0.2	0.4	0.6	0.8	1.2	1.6	2
Modified model	Pixel aggrement	111	[1;110]	111	111	[1;110]	111	111
	ARI	1	0	1	1	0	1	1
	Entropy	0	0.0513965	0	0	0.0513965	0	0
Baseline	Pixel aggrement (0.2_modified model vs baseline model)	[1;110]	[6;105]	[105;6]	[6;105]	[6;105]	111	[1,110]
	ARI (0.2_modified model vs baseline model)	0	0	0	0	0	1	0
	Entropy (0.2_modified model vs baseline model)	0.0513965	0.210283	0.210283	0.210283	0.210283	0	0.0513965
cluster 6	Resolution (Leiden)	0.2	0.4	0.6	0.8	1.2	1.6	2
Modified model	Pixel aggrement	83	83	83	83	83	83	83
	ARI	1	1	1	1	1	1	1
	entropy	0	0	0	0	0	0	0
Baseline	Pixel aggrement (0.2_modified model vs baseline model))	83	83	83	83	83	[81;2]	[2;81]
	ARI (0.2_modified model vs baseline model)	1	1	1	1	1	0	0
	Entropy (0.2_modified model vs baseline model)	0	0	0	0	0	0.113579	0.113579
