# Supplementary material for: Graph Fourier transform for spatial omics representation and analyses of complex organs
Source: Research Square preprint supplement (doi:10.21203/rs.3.rs-3952048/v1), 2024-02-15
Supplement: Supplementary file 16 [file cb86f73cd349eed779288a34.xlsx]

## Sheet: total_statics
	184A1_unperturbed/I09	184A1_unperturbed/I11	184A1_TSA/I16	184A1_triptolide/I10	Total
cells having cluster 5	123 (22.1%)	155 (24.0%)	172 (27.9%)	64 (12.6%)	514 (22.1%)
cells having cluster 6	175 (31.4%)	152 (23.6%)	177 (28.7%)	117 (23.1%)	621 (26.7%)
Total cells	557	645	617	506	2325
pixels of cluster 5	2458 (0.03%)	2787 (0.03%)	4829 (0.06%)	142 (0.002%)	10216 (0.04%)
pixels of cluster 6	2172 (0.03%)	1684 (0.02%)	2028 (0.03%)	1948 (0.03%)	7832 (0.03%)
Total pixels	7218204	8325021	7712953	5998677	29254855
mean pixel/cell in cluster 5	20 (0.15%)	18 (0.14%)	28 (0.22%)	2 (0.02%)	20 (0.16%)
mean pixel/cell in cluster 6	12 (0.09%)	11 (0.09%)	11 (0.09%)	17 (0.14%)	13 (0.10%)
mean pixels/cells	12959	12907	12501	11855	12583
