# Supplementary material for: Graph Fourier transform for spatial omics representation and analyses of complex organs
Source: Research Square preprint supplement (doi:10.21203/rs.3.rs-3952048/v1), 2024-02-15
Supplement: Supplementary file 19 [file ff269946c070b30a538fdba9.xlsx]

## Sheet: Sheet1
Modified TACCO grid search
S\lamada	0	0.2	0.4	0.6	0.8	1
4	0.1511	0.1044	0.0916	0.0702	0.0699	0.0777
8	0.1832	0.119	0.0858	0.0701	0.068
12	0.1831	0.1265	0.0833	0.0718	0.0677
16	0.1785	0.1291	0.0973	0.0705	0.0673
20	0.173	0.1222	0.0949	0.0728	0.0672
24	0.1802	0.1241	0.1027	0.0698	0.0669
28	0.1802	0.1296	0.1015	0.07	0.0674
Independent test
Bead size	TACCO+SpaGFT	TACCO basline	Improvement (%)
10	0.0654718	0.0754348	13.2075
20	0.0638014	0.0748456	14.756
30	0.0685109	0.0750509	8.71409
40	0.0656355	0.07516	12.6723
50	0.0650516	0.0764634	14.9245
